# Supplementary material for: Mechanism of skin whitening through San-Bai decoction-induced tyrosinase inhibition and discovery of natural products targeting tyrosinase
Source: PubMed Central journal article supplement — Medicine (Baltimore). 2023 Mar 31;102(13):e33420. doi: 10.1097/MD.0000000000033420 (PMC10063273; doi:10.1097/md.0000000000033420), 2023-03-31
Supplement: medi-102-e33420-s001.pdf [file medi-102-e33420-s001.pdf]

Supplementary Table 1. Medicinal properties, medicinal flavors and meridian attribution of herbs in San-Bai decoction

| <b>Herbs</b>                                          | <b>Property and flavor</b>    | <b>Channel Tropism</b>          |
|-------------------------------------------------------|-------------------------------|---------------------------------|
| <i>Paeoniae radix alba</i><br>(Baishao)               | Slightly cold<br>Sour, Bitter | Spleen, Liver                   |
| <i>Atractylodis macrocephalae rhizoma</i><br>(Baizhu) | Warm<br>Sweet, Bitter         | Spleen, Stomach                 |
| <i>Poria</i><br>(Baifuling)                           | Bland, Neutral<br>Sweet       | Spleen, Lung, Heart,<br>Kidney  |
| <i>Glycyrrhizae radix et rhizoma</i><br>(Gancao)      | Neutral<br>Sweet              | Spleen, Lung, Heart,<br>Stomach |
