# Supplementary material for: Mechanism of skin whitening through San-Bai decoction-induced tyrosinase inhibition and discovery of natural products targeting tyrosinase
Source: PubMed Central journal article supplement — Medicine (Baltimore). 2023 Mar 31;102(13):e33420. doi: 10.1097/MD.0000000000033420 (PMC10063273; doi:10.1097/md.0000000000033420), 2023-03-31
Supplement: medi-102-e33420-s002.pdf [file medi-102-e33420-s002.pdf]

Supplementary Table 2. Count of active compounds in San-Bai decoction target tyrosinase and estrogen Receptor 1

| <b>Targets</b> | <b>Baishao</b> | <b>Gancao</b> | <b>Baizhu</b> | <b>Baifuling</b> | <b>Sum after deduplication</b> |
|----------------|----------------|---------------|---------------|------------------|--------------------------------|
| TYR            | 17             | 40            | 2             | 7                | 66                             |
| ESR1           | 19             | 87            | 8             | 27               | 142                            |
