# Supplementary material for: Mechanism of skin whitening through San-Bai decoction-induced tyrosinase inhibition and discovery of natural products targeting tyrosinase
Source: PubMed Central journal article supplement — Medicine (Baltimore). 2023 Mar 31;102(13):e33420. doi: 10.1097/MD.0000000000033420 (PMC10063273; doi:10.1097/md.0000000000033420), 2023-03-31
Supplement: medi-102-e33420-s004.pdf [file medi-102-e33420-s004.pdf]

Supplementary Figure 2. Molecular docking pattern of TYR with natural product library active compounds

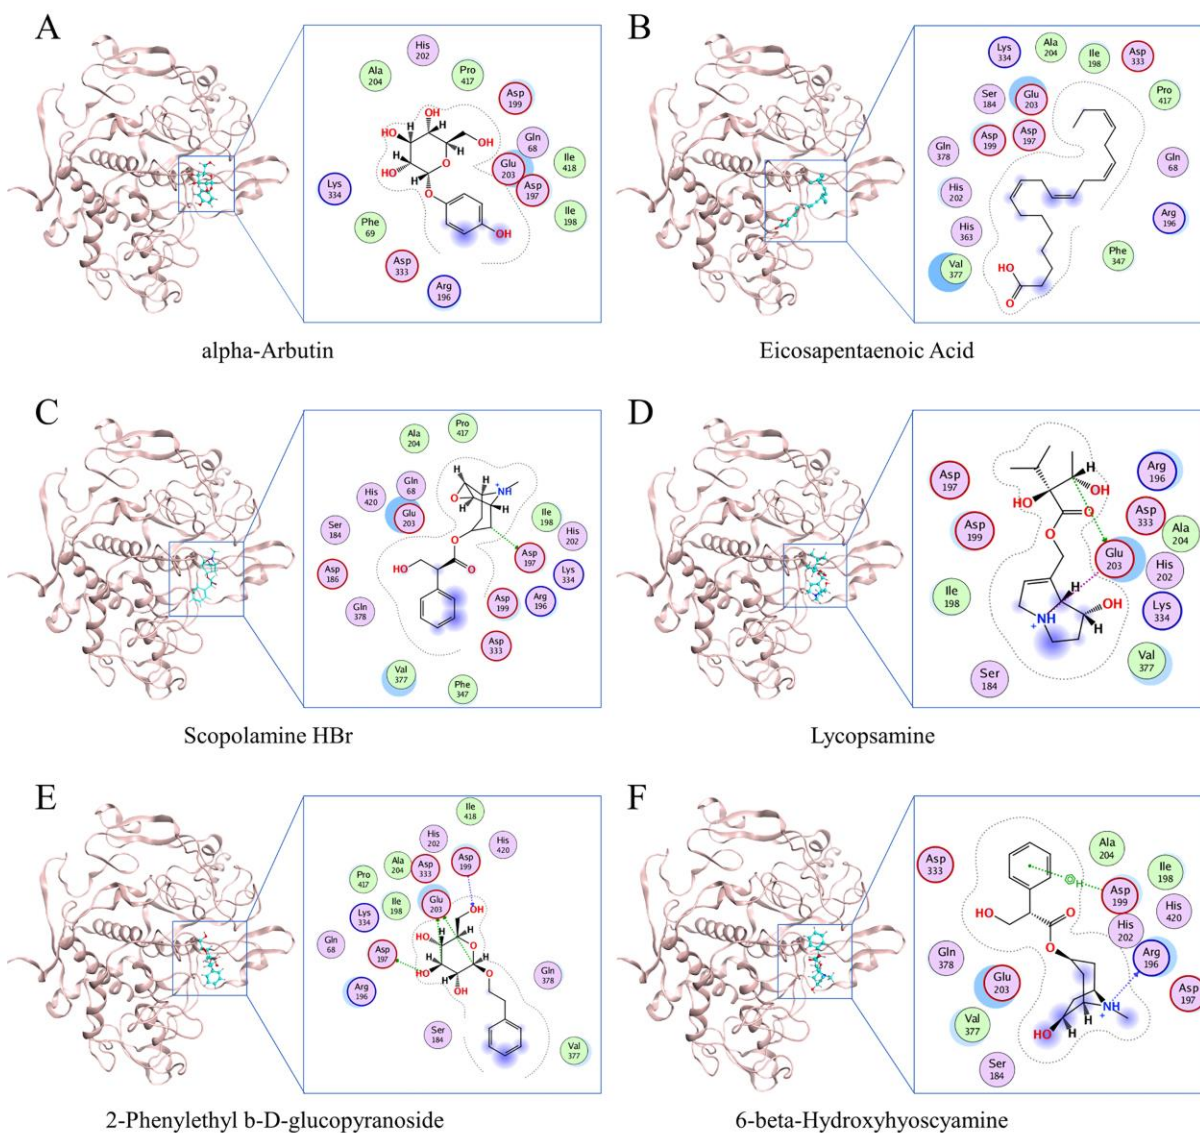

- |                     |                      |                     |                 |
|---------------------|----------------------|---------------------|-----------------|
| ○ polar             | → sidechain acceptor | ○ solvent residue   | ⊗ arene-arene   |
| ● acidic            | ← sidechain donor    | ⊙ metal complex     | ⊗H arene-H      |
| ○ basic             | → backbone acceptor  | ⋯ solvent contact   | ⊗+ arene-cation |
| ● greasy            | ← backbone donor     | ⋯ metal/ion contact |                 |
| ○ proximity contour | ● ligand exposure    | ○ receptor exposure |                 |
