# Supplementary material for: Mechanism of skin whitening through San-Bai decoction-induced tyrosinase inhibition and discovery of natural products targeting tyrosinase
Source: PubMed Central journal article supplement — Medicine (Baltimore). 2023 Mar 31;102(13):e33420. doi: 10.1097/MD.0000000000033420 (PMC10063273; doi:10.1097/md.0000000000033420), 2023-03-31
Supplement: medi-102-e33420-s005.pdf [file medi-102-e33420-s005.pdf]

Supplementary Table 3. Other Traditional Chinese Medicine sources of tyrosinase inhibitors in *San Bai* decoction

| <b>Compound Name</b>               | <b>Pubchem ID</b> | <b>SBD Source</b> | <b>Other Sources</b>                      | <b>Database source</b> |
|------------------------------------|-------------------|-------------------|-------------------------------------------|------------------------|
| Pentagalloylglucose                | 65238             | Baishao           | Chishao, Hezi, Hetaoren, Mudanpi, Yuganzi | TCMSP                  |
| 1,3,6-tri-O-galloyl-beta-D-glucose | 452707            | Baishao           | Daodou, Hezi                              | TCMIP                  |
| 1,2,4,6-tetragalloylglucose        | 11297287          | Baishao           | Daodou, Chishao                           | TCMIP                  |
| Liquiritigenin 4',7-diglucoside    | 73981649          | Gancao            | ----                                      | TCMIP                  |

SBD = *San Bai* decoction
